1

2 **Novel Eukaryotic Association Module in Phage WO**

3 **Genomes from *Wolbachia***

4

5

6

7 Sarah R. Bordenstein<sup>a</sup> and Seth R. Bordenstein\*<sup>a,b</sup>

8

9 **Affiliations:**

10 <sup>a</sup>Department of Biological Sciences, Vanderbilt University, Nashville, TN 37232, USA.

11 <sup>b</sup>Department of Pathology, Microbiology, and Immunology, Vanderbilt University,  
12 Nashville, TN 37232, USA.

13

14 **Viruses are trifurcated into eukaryotic, archaeal and bacterial categories. This**  
15 **domain-specific ecology underscores why eukaryotic viruses typically co-opt**  
16 **eukaryotic genes and bacteriophages commonly harbor bacterial genes. However,**  
17 **the presence of bacteriophages in obligate intracellular bacteria of eukaryotes may**  
18 **promote DNA transfers between eukaryotes and bacteriophages. Here we report the**  
19 **first metagenomic analysis of purified bacteriophage WO particles of *Wolbachia* and**  
20 **uncover a novel eukaryotic association module. It encodes domains, such as the**  
21 **black widow latrotoxin-CTD, that are uninterrupted in bacteriophage genomes,**  
22 **enriched with eukaryotic protease cleavage sites, and combined with additional**  
23 **domains to forge one of the largest bacteriophage genes to date (14,256 bp). These**  
24 **domains have never before been reported in packaged bacteriophages, and their**  
25 **phylogeny, distribution and sequence diversity imply lateral transfers between**  
26 **animal and bacteriophage genomes. Finally, the WO genome sequences and**  
27 **identification of attachment sites will potentially advance genetic manipulation of**  
28 ***Wolbachia*.**  
29

30 Viruses are the most abundant and diverse biological entities in the biosphere<sup>1,2</sup>. Infecting  
31 organisms across the tree of life, they associate with every ecosystem on the planet. They  
32 are generally classified into polythetic groups according to ecological niche and mode of  
33 replication<sup>3,4</sup>. While any cellular domain can be infected by a virus, no extant virus is  
34 known to traverse more than one domain<sup>5,6</sup>. This domain-specific ecology of viruses  
35 underpins the current taxonomic paradigm of trifurcating viruses into eukaryotic,  
36 archaeal and bacterial categories, along with recent reappraisals of whether viruses  
37 constitute a fourth domain of life<sup>7,8</sup>. As a result of this domain-specific ecology, viruses  
38 often integrate host genes via specific highways of lateral gene transfer. Eukaryotic  
39 viruses tend to hijack genes directly from their eukaryotic hosts to evade, manipulate and  
40 counter-strike anti-viral immune responses<sup>9,10</sup>, with the exception of some giant viruses  
41 that appear to acquire genes from all domains of life<sup>11</sup>. Bacterial viruses, or  
42 bacteriophages (phages), integrate genetic material from their bacterial hosts including  
43 toxin<sup>12</sup>, photosynthesis<sup>13</sup> and pigment biosynthesis genes<sup>14</sup> that contribute to the fitness  
44 of their bacterial host. To date, however, there is no archetypal case of phage particles  
45 harboring genomes with eukaryotic DNA.

46

47 While all viruses are specific to one of the three domains of life, some bacteriophages  
48 target obligate intracellular bacteria of eukaryotic cells. For instance, phage WO infects  
49 the obligate intracellular alpha-proteobacteria *Wolbachia*, which in turn infect an  
50 estimated 40% of the most speciose group of animals worldwide - arthropods (as well as  
51 filarial nematodes). They cause a range of host reproductive pathologies<sup>15,16</sup>, primarily  
52 infect the cells of host reproductive tissues, exist in Golgi-derived vesicles within the

53 eukaryotic cytoplasm, and are enclosed by a bacterial cell membrane and one or more  
54 eukaryotic-derived membranes<sup>17,18</sup>. Nearly all sequenced *Wolbachia* genomes, with the  
55 exception of those acting as obligate mutualists, harbor prophage WO<sup>19-21</sup>. They encode  
56 conserved structural modules (e.g., head, tail, baseplate) and exhibit *Caudovirales*  
57 morphology in electron micrographs of purified phages<sup>20,22-25</sup>. Electron microscopy and  
58 quantitative analyses indicate that prophages undergo a lytic phase capable of rupturing  
59 bacterial and eukaryotic cell membranes, and phage WO occurs in the extracellular  
60 matrix of arthropod gonads<sup>23,26</sup>. Therefore, phage WO appears to uniquely contend with  
61 the cellular exit, entry and defense mechanisms of two separate domains of life. WO is  
62 also a promising tool for genome editing of *Wolbachia* that has thus far been refractory to  
63 genetic modification. Here we assemble the first sequenced genomes of phage WO  
64 particles, resolve the bacteriophage attachment and bacterial integration sites, report a  
65 novel eukaryotic association module in bacteriophages, and discuss lateral gene transfers  
66 between eukaryotes and bacteriophages.

67

## 68 **RESULTS**

### 69 *Phage WO Genomes Reveal A Novel Eukaryotic Association Module*

70 Here we report the first metagenomic analysis of phage WO particles from *wVitA*-  
71 infected *Nasonia giraulti* wasps and *wCauB*-infected *Ephestia kuehniella* moths (the *w*-  
72 prefix indicates specific *Wolbachia* strain and WO-prefix indicates phage haplotype; see  
73 Supplementary Table 1 for a complete list). We identify the phage attachment sites and  
74 insertion regions and show from fully sequenced genomes that WO harbors all formerly  
75 described phage genetic modules (lysogeny, baseplate, head, replication, virulence, tail

76 and patatin-like phospholipase<sup>27</sup>) as well as a new group of genes with atypical protein  
 77 domains indicative of eukaryotic interaction. We collectively group these genes, which  
 78 include the second largest gene in bacteriophages to date, into a novel "Eukaryotic  
 79 Association Module" (EAM, white box, Fig. 1). The EAM features genes that (i) encode  
 80 protein domains and cleavage sites central to eukaryotic functions, (ii) occur in phage and  
 81 metazoan hosts, (iii) are among the largest genes in phage genomes (up to 14,256 bp) and  
 82 (iv) are absent from mutualistic, phage-free genomes such as the bedbug-infesting *w*Cle  
 83 and filarial nematode-infesting *w*Bm and *w*Oo. They occur in all complete prophage WO  
 84 haplotypes (Supplementary Table 2).

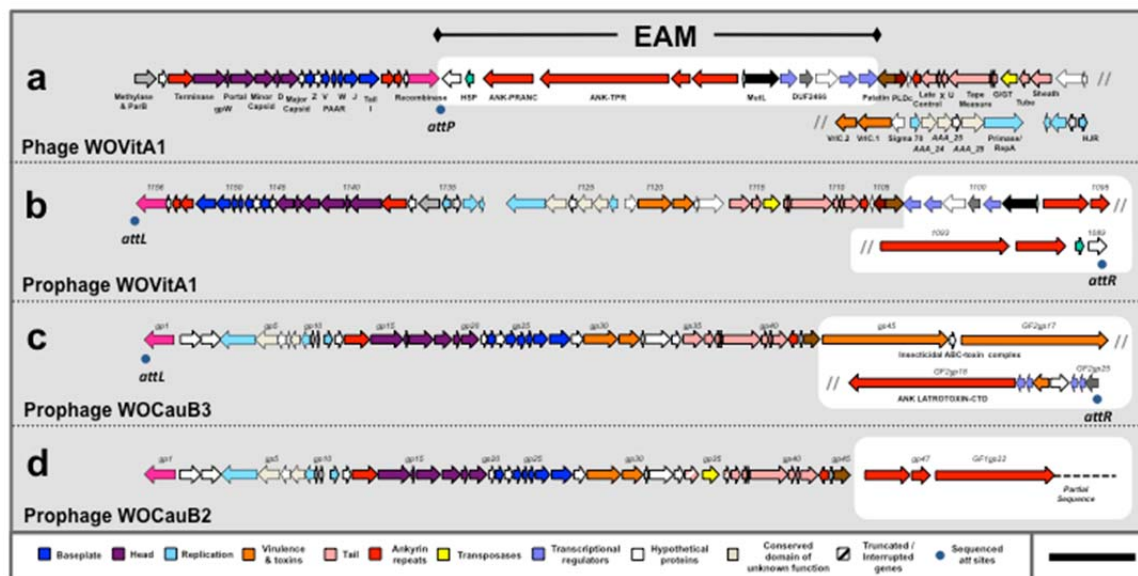

85

86 **Figure 1 | Phage WO genomes harbor a novel Eukaryotic Association Module**

87 (EAM). The complete phage WO genome for (a) WOvitA1 was sequenced directly  
 88 from purified viral particles using high throughput, metagenomic sequencing. The  
 89 prophage (b) WOvitA1, (c) WOCauB3 and (d) WOCauB2 genomes were reannotated  
 90 based on sequencing reads obtained from purified particles; complete genomes of  
 91 WOCauB3 and WOCauB2 were not obtained. Each genome consists of a bacteriophage-

92 like region (recombinase to patatin) and EAM highlighted in white. Gray slash marks  
93 indicate illustrative continuation of the genome. Dark blue dots indicate the discovery of  
94 the *attL* and *attR* sites of the prophage, which adjoin in the packaged WO genome to  
95 form *attP*. Numbers above the open reading frames indicate locus tags.

96 Scale bar, 5,000 base pairs.

97

98 To verify the newly discovered EAM in the phage genome, we identified the terminal  
99 prophage WO genes and Sanger sequenced amplicons from an independent sample of  
100 phage WOVitA1 (Fig. 1a) across the linear phage *attP* site (hypothetical protein  
101 gwv\_1089 to recombinase, Supplementary Fig. 1). Next, using the newly identified *attR*  
102 and *attL* sites, we extrapolated the bacterial *attB* site in WOVitA1, which is a noncoding,  
103 repetitive sequence in *Wolbachia* from *Nasonia* wasps (Supplementary Fig. 1e). The full  
104 length of the completely assembled, linear WOVitA1 genome is 65,653 bp, which is  
105 23,531 bp larger than the previous prophage WO annotation. Similarly, we identified the  
106 new terminal ends of the WOCauB3 prophage [23,099 bp (51%) larger than original  
107 estimate of 45,078 bp], extending the previous observation that the end of the genome is  
108 beyond the patatin gene<sup>25</sup>, along with internal localization of the EAM genes by Sanger  
109 sequencing its *attP* site [Domain of Unknown Function (DUF)2426 to recombinase].  
110 While we were not able to assemble a complete contig for WOCauB2, it is more than  
111 6,854 bp larger than the original estimate of 43,016, includes multiple ankyrin repeat  
112 genes homologous to those in WOVitA1, and, like many other prophage haplotypes (e.g.,  
113 WORiC, WOVitA2, WOSuziC), integrates directly into *Wolbachia*'s magnesium  
114 chelatase (*chlI*) gene.

115

116 *The EAM Is Enriched With Eukaryotic-like Domains*

117 We then analyzed each phage WO protein domain for homology and surrounding peptide  
118 architecture. Unlike the single domain architecture of phage WO's structural genes, EAM  
119 genes are highly polymorphic and encompass fusions of both eukaryotic and bacterial  
120 protein domains. By extending the analysis to include homologous prophage regions  
121 from all sequenced *Wolbachia* chromosomes, ten types of protein domains with putative  
122 eukaryotic functions were uncovered spanning four predicted functions: (i) toxins, (ii)  
123 host-microbe interactions, (iii) host cell suicide, and (iv) secretion of proteins through the  
124 cell membrane (Fig. 2). Notably, over half of these domain types (6/10; latrotoxin-CTD,  
125 PRANC, NACHT, SecA, gwv\_1093-NTD, Octomom-NTD) share greater amino acid  
126 homology to eukaryotic invertebrates than to bacteria in GenBank. Among this subset  
127 with eukaryotic sequence homology, the protein domains are almost exclusively found in  
128 the prophage EAM region (N=17) versus the *Wolbachia* chromosome (N=2). In the latter  
129 case, the two chromosomal latrotoxin-CTD domains (wNo\_10650 and wHa\_05390) are  
130 flanked by phage-associated genes and transposases, indicating a likely phage WO origin  
131 and subsequent genomic rearrangement. This pattern differs from other EAM protein  
132 domains with bacterial homology, which are equally dispersed in phage WO (N=19) and  
133 the *Wolbachia* chromosome (N=18) (Fig. 2, Fisher's Exact Test,  $p = 0.0072$ ). The  
134 difference importantly indicates that the eukaryotic-like protein domains are highly  
135 enriched in the EAM, suggesting a near exclusive role in phage WO biology.

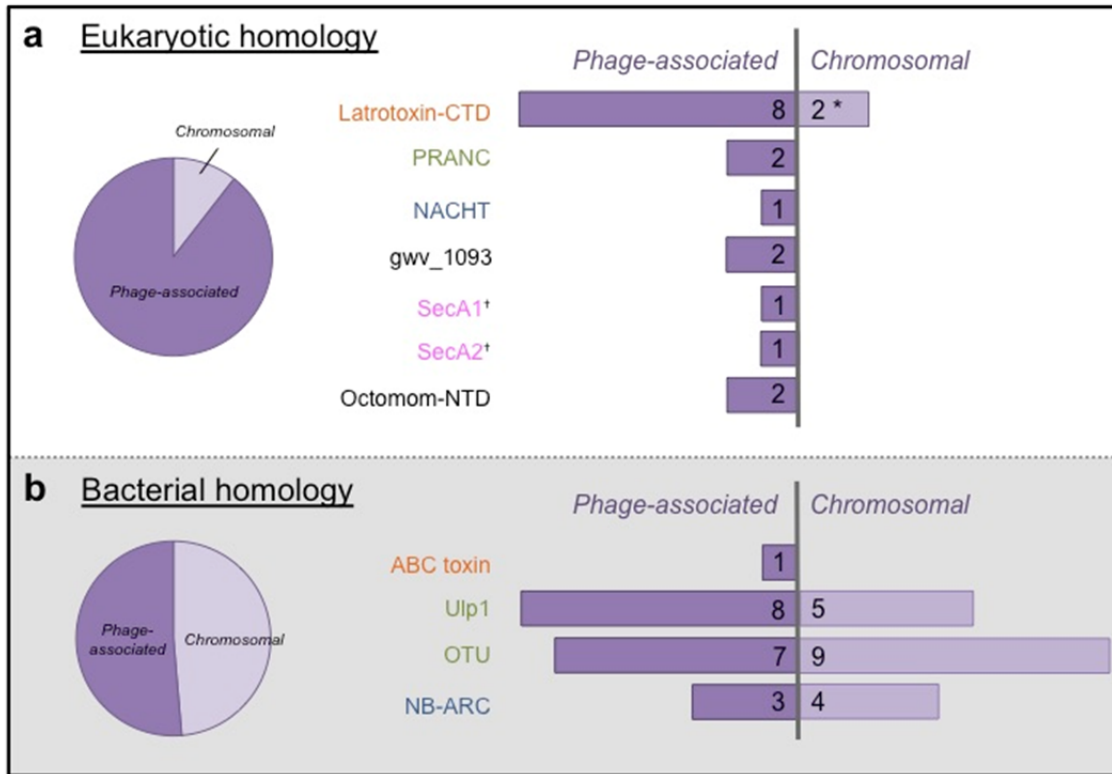

136

137 **Figure 2 | Eukaryotic-like EAM genes are enriched in prophage WO regions in the**  
 138 ***Wolbachia* chromosome.** EAM genes with (a) eukaryotic homology are most likely to be  
 139 associated with prophage WO while those with (b) bacterial homology are both phage-  
 140 associated and found scattered throughout the *Wolbachia* chromosome. (\*) The two  
 141 chromosomal latrotoxin-CTD domains (wNo\_10650 and wHa\_05390) are located within  
 142 phage-associated genes and transposases, indicating a potential genomic rearrangement.  
 143 (†) SecA represents one “domain type” but is listed separately because phage WO  
 144 contains two different homologs (i.e., wHa\_3920 and wHa\_3930). Putative functional  
 145 categories are: anti-eukaryotic toxins (orange); host-microbe interactions (green); host  
 146 cell suicide (blue); secretion of virulence factors (pink); and unknown (black). Octomom  
 147 refers to WD0513 of the *wMel* genome.



148

149 *The Black Widow Latrotoxin-CTD*

150 Latrotoxin C-terminal domain (CTD) is the most prevalent eukaryotic domain in  
151 prophage WO. Originally described for its major role in the venom of widow spiders  
152 (*Latrodectus* species), latrotoxins act extracellularly to cause the formation of ion-  
153 permeable membrane pores in their vertebrate or invertebrate victims. The CTD,  
154 specifically, is only associated with the latrotoxin precursor molecule (protoxin) and  
155 could possibly act intracellularly to facilitate disintegration of the spider's toxin-  
156 producing cells<sup>28</sup>. While latrotoxins are generally considered exclusive to spiders, CTD-  
157 homologs in *Wolbachia*, *Rickettsiella grylli*<sup>28</sup>, and a transcriptome from a *Wolbachia*-  
158 infected stink bug<sup>29</sup> have been reported. Here, phylogenetic analysis implies that the  
159 latrotoxin-CTD horizontally transferred between widow spiders and phage WO (Fig. 3).  
160 Reciprocal search queries using homologous spider and phage CTDs return the same  
161 BLASTP hits shown in Fig. 3. Notably, phage WO CTD sequences have the highest  
162 amino acid similarity to black widow spider homologs that target invertebrates, which are  
163 the primary hosts of *Wolbachia*. While convergent evolution could explain amino acid  
164 sequence similarities of the latrotoxin-CTD in black widows and *Wolbachia*, these two  
165 taxa occur in overlapping ecological niches (*Wolbachia* are known to infect spiders of the  
166 family *Theridiidae*) in which gene transfers are likely to happen<sup>30</sup>. We also confirmed the  
167 presence of *Wolbachia* in three independent *Latrodectus geometricus* samples by  
168 amplifying *Wolbachia* 16S rDNA and *wsp* membrane protein genes. The transfer event  
169 was apparently followed by a relatively more recent transfer from phage WO back to

170 animals in the *Aedes aegypti* genome, where the region is located between genes of  
171 mosquito origin [fibrinogen-related protein (AAEL004156) and Gale3 (AAEL004196)].

172

### 173 *Toxin Activation by Eukaryotic Furin Cleavage*

174 Latrotoxin-CTD is universally located at the 3'-terminal ends of both conserved spider  
175 latrotoxin genes<sup>31</sup> and enormous, polymorphic, and eukaryotic-like phage WO genes (up  
176 to 14,256 bp). There is a high incidence of eukaryotic furin cleavage sites that  
177 immediately precede the latrotoxin-CTD. In spiders, cleavage at these sites by the  
178 eukaryotic furin protease in the trans-Golgi network or extracellular matrix is required for  
179 latrotoxin activation before the toxin exerts its effects upon the victim. We show that all  
180 prophage WO EAMs contain at least one site for eukaryotic furin cleavage  
181 (Supplementary Table 3), and the proportion of all EAM genes with predicted furin  
182 cleavage sites (25%) is two-fold greater than that of the genes in the core phage genome  
183 (11%, Fisher's Exact Test,  $p < 0.0001$ ), defined as the conserved bacteriophage region  
184 from recombinase to patatin. In regards to the phage WO latrotoxin-CTD, its preferential  
185 localization in prophage WO genomes versus the rest of the *Wolbachia* chromosome,  
186 conservation of eukaryotic furin cleavage sites, large eukaryotic-like length, homology  
187 to invertebrate-specific toxins, and reduced divergence relative to the spider venom  
188 homologs is consistent with a eukaryotic origin and post-translational processing by furin  
189 peptidases.

190

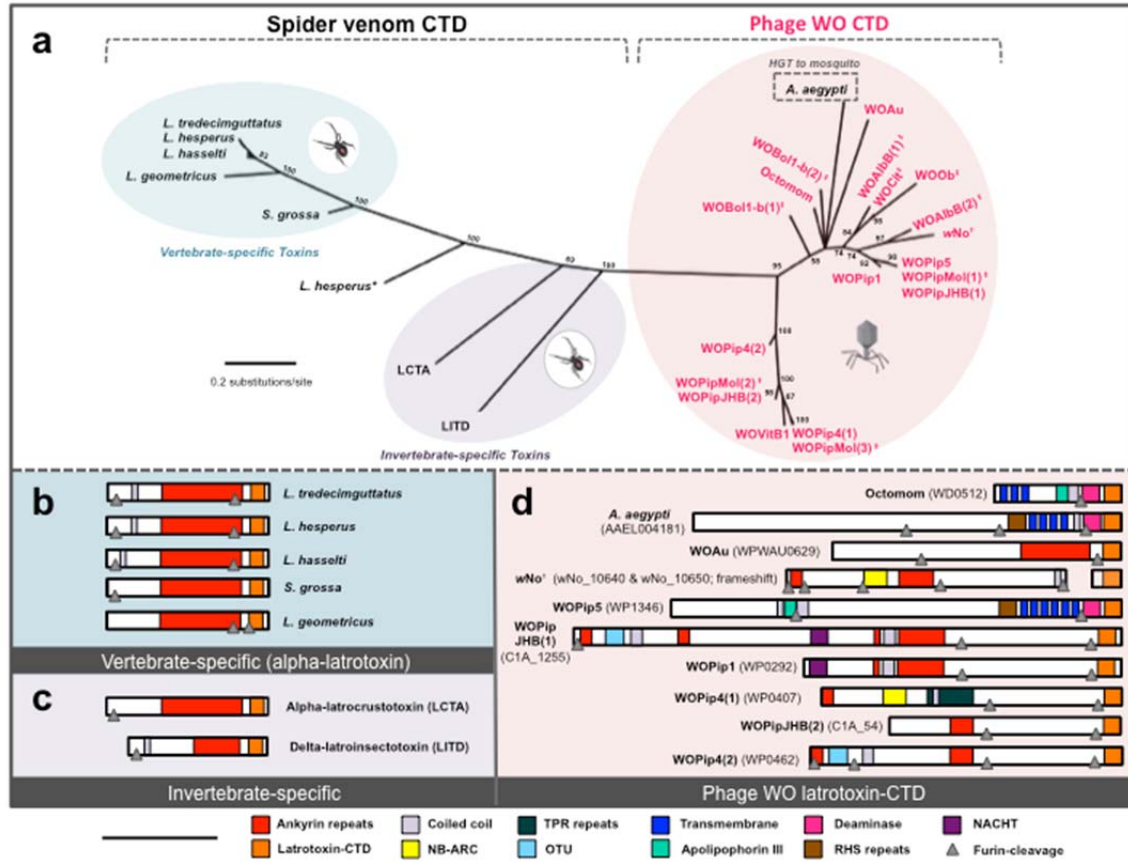

191

192 **Figure 3 | Latrotoxin-CTD phylogeny and protein architecture support lateral**

193 **genetic transfers.** (a) Phylogeny of phage WO latrotoxin-CTD protein domains and their

194 eukaryotic homologs was constructed by Bayesian analysis of 74 amino acids using the

195 JTT model of evolution. Consensus support values are shown at the nodes. Comparative

196 protein architecture shows that spider venom (b) vertebrate-specific alpha-latrotoxins and

197 (c) invertebrate-specific alpha- and delta-latrotoxins are highly conserved, whereas (d)

198 phage WO are not. Bolded nomenclature in (d) denotes the specific phage WO haplotype

199 (listed as WO). Genome locus tags are listed in parentheses. Predicted furin cleavage

200 sites, listed in Supplementary Table 3, are illustrated with gray triangles. (\*) A second *L.*

201 *hesperus* sequence represents a recently-described downstream paralog with unknown

202 toxin activity<sup>32</sup>. (†) wNo\_10650 is located within phage-associated genes and

203 transposases, indicating a potential genomic rearrangement of a phage region.  
204 (‡) Architecture is not shown for sequences on incomplete contigs (WOBo11-b,  
205 WOAlbB, WOCit, WOPipMol, WOVitB) because complete peptide information and  
206 specific phage association are unknown. Scale bar, 1,000 amino acids.

207

208 ***Pox protein Repeats of ANkyrin C terminus (PRANC)***

209 Domains central to modifying animal proteins are also abundant in the phage WO EAM.  
210 The PRANC domain in the WOVitA1 genome (gww\_1092) shares protein sequence  
211 homology with corresponding PRANC domains in multiple parasitic wasp hosts  
212 (Supplementary Table 4) and their eukaryotic viruses. Reciprocal BLASTP searches  
213 retrieve the same best hits and support previous findings that this protein domain  
214 horizontally transferred between eukaryotic viruses, animals, and *Proteobacteria*<sup>33</sup>. The  
215 discovery here of the eukaryotic-like PRANC domain in phage WO parallels its presence  
216 in the *Poxviridae* virus family, in which it functions in evasion of eukaryotic immune  
217 responses via modification of host ubiquitination. PRANC is related to amino acid  
218 sequences in F-box proteins, which are eukaryotic proteins involved in protein  
219 degradation. The PRANC domain also occurs in vaccinia virus, ectromelia virus, cowpox  
220 virus and Orf virus and can regulate NF-κB signalling pathway to inhibit transcription of  
221 inflammatory cytokines<sup>34</sup>.

222

223 ***Conserved Ankyrin and Tetratricopeptide Repeat (TPR) Protein***

224 Adjacent to the PRANC-encoding gene in WOVitA1's EAM is an ankyrin and TPR-  
225 containing gww\_1093. Ankyrin repeats and TPRs mediate a broad range of protein-

226 protein interactions (apoptosis, cell signaling, inflammatory response, etc.) within  
227 eukaryotic cells and are commonly associated with effector proteins of certain  
228 intracellular pathogens<sup>35,36</sup>. In *Wolbachia*, ankyrins within the core phage genome have  
229 been associated with reproductive manipulation of the insect host<sup>37,38</sup>. While generally  
230 rare in viral genomes (Supplementary Fig. 2 and 3, respectively), these repeat regions  
231 occur in all prophage WO haplotypes from sequenced *Wolbachia* genomes (N=23).  
232 Phylogenetic analysis using reciprocal BLASTP hits (Fig. 4) shows that the N-terminus  
233 sequences of the TPR-containing gwv\_1093 are embedded within a diverse set of  
234 homologs from many arthropod lineages (Fig. 4b), with the most recent transfer putatively  
235 occurring between phage WO and *Solenopsis invicta* (Fig. 4c). In this species, the gene is  
236 located between ant genes bicaudal D and rho guanine nucleotide exchange factor 11. As  
237 *S. invicta* can naturally harbor *Wolbachia*<sup>39</sup>, either a gene transfer event occurred between  
238 these ecologically-associated taxa or the *S. invicta* homolog could be an assembly  
239 artifact. This assembly was based on samples from a region rarely infected with  
240 *Wolbachia* (Y Wurm, personal communication, April 2016) and there are no other  
241 *Wolbachia*/prophage WO homologs in the *S. invicta* genome; therefore, the latter  
242 explanation seems unlikely. Moreover, other gwv\_1093 homologs are from insect  
243 genome sequences of uninfected strains, i.e., *N. vitripennis*, and thus they can not be  
244 derived by an assembly artifact. Based on parsimony, the transfer event appears to have  
245 occurred from arthropod to phage WO since the arthropod taxa comprise a more diverse  
246 set of lineages. However, the reverse is plausible as transfers from *Wolbachia* to their  
247 arthropod hosts are common<sup>40-42</sup>.  
248

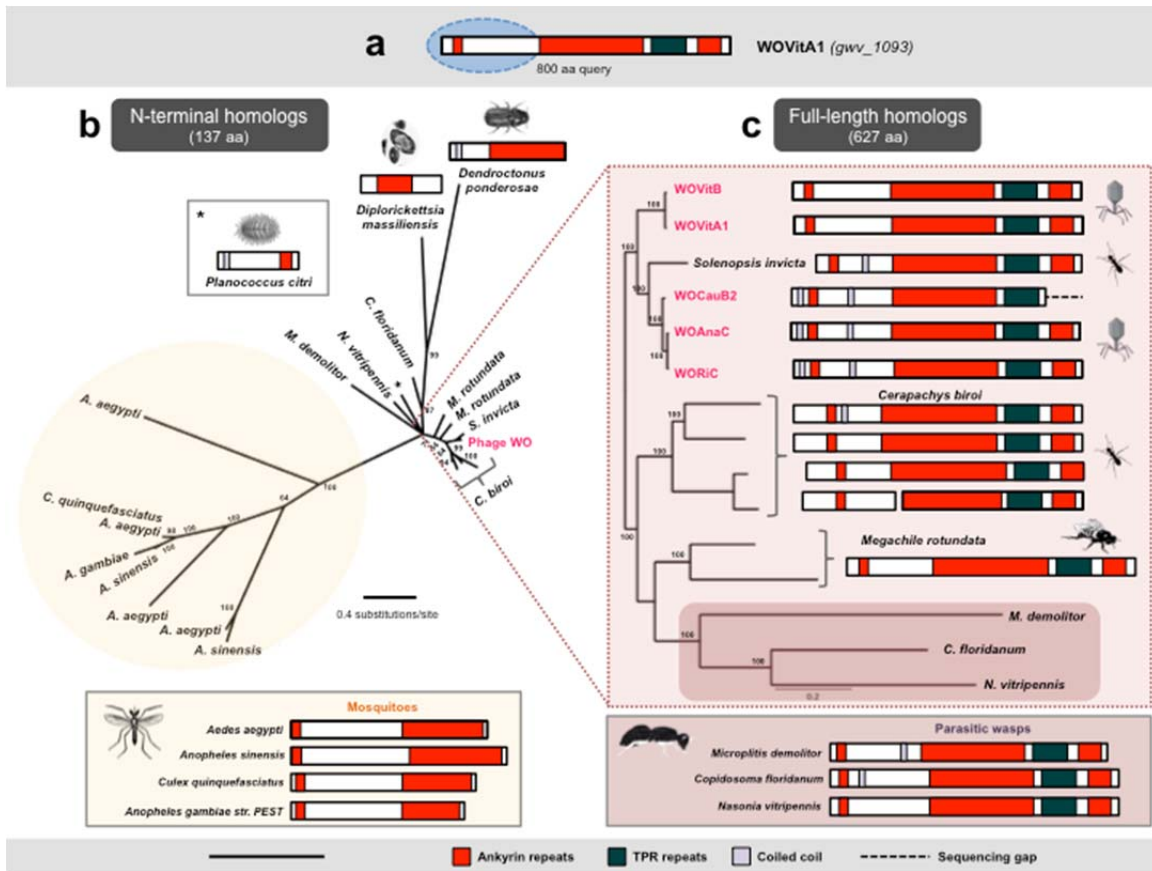

249

250 **Figure 4 | Phylogeny and protein architecture of a conserved TPR and anyrin-**

251 **repeat protein support lateral genetic transfers. (a) A BLASTP query of WOVitA1's**

252 **gwv\_1093 N-terminus reveals homologs in mosquitoes, ants, beetles, a mealybug, a**

253 **solitary bee and one obligate intracellular gammaproteobacteria. Bayesian phylogenetic**

254 **trees were constructed based on (b) a 137-aa alignment of all homologs with E-value less**

255 **than  $e^{-40}$  using the LG+G model of evolution. (c) To resolve taxa closest to phage WO,**

256 **trees were reconstructed based on a 627-aa alignment of all homologs with an E-value of**

257 **0 using the JTT+I+G model of evolution. Isoforms were removed from each alignment.**

258 **Both trees are unrooted. Consensus support values are shown at the nodes. Chromosomal**

259 **neighborhood analyses of available animal genome sequences indicate that animal**

260 homologs to the phage WO protein are on contigs with other animal genes. Scale bar,  
261 1,000 amino acids.  
262  
263 *NACHT*  
264 Another instance of genetic transfer involves the programmed cell death (PCD) domain,  
265 *NACHT* (Fig. 5). Eukaryotic *NACHT*-containing proteins are typically engaged in PCD  
266 by acting as pathogen-sensors and signal transduction molecules of the innate immune  
267 system<sup>43</sup>. The polymorphic prophage WO homolog encodes ankyrin repeats and a  
268 latrotoxin-CTD directly downstream from the conserved NTPase domain (Fig. 5a).  
269 *NACHT* domains have been identified in animals, fungi and bacteria<sup>44</sup> and phylogenetic  
270 patterns indicate multiple instances of horizontal transfer<sup>45</sup>. A *NACHT*-containing  
271 peptide was recently discovered in the *Clostridium difficile*-infecting phage phiCDHM1  
272 genome<sup>46</sup> although, in contrast to prophage WO, the phiCDHM1 *NACHT* domain is  
273 bacterial in both amino acid homology and protein architecture. While all BLASTP and  
274 reciprocal BLASTP queries of the phiCDHM1 *NACHT* domain yield only bacterial  
275 homologs, BLASTP searches of the prophage WO *NACHT* domain yield only animals,  
276 and reciprocal BLASTP searches of the animal homologs yield only prophage WO and  
277 other animals. Similar to the phylogeny of the N-terminus of the TPR-containing  
278 gwv\_1093, this single *NACHT* domain sequence in prophage WO is embedded within a  
279 more diverse set of homologs in arthropods (Fig. 5b,c). Phylogenetic analyses place the  
280 prophage WO variants adjacent to a divergent *Bombyx mori* sequence, though these  
281 variants have slightly closer total homology to *Culex quiquefasciatus* mosquitoes that  
282 harbor *Wolbachia* with related prophage WO variants.



283

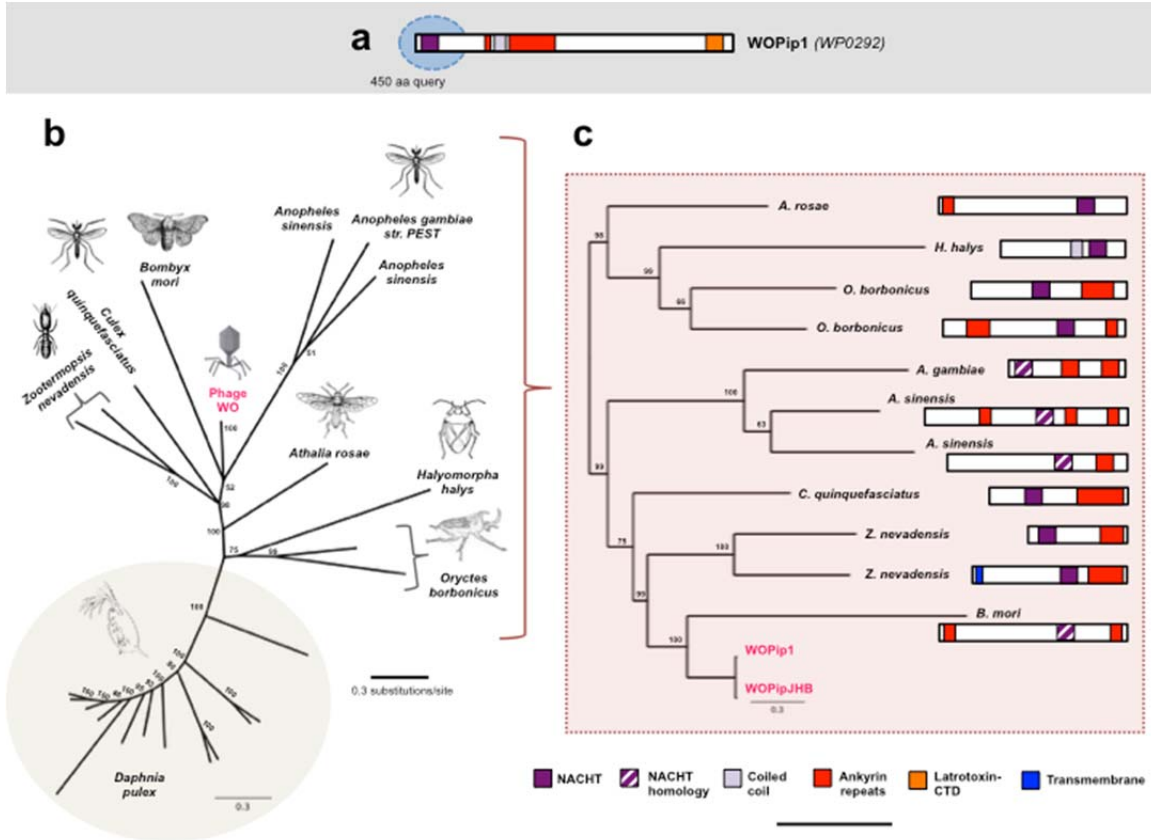

284

285 **Figure 5 | Phylogeny and protein architecture of the programmed cell death**  
 286 **domain, NACHT, support lateral genetic transfers.** (a) A BLASTP query of prophage  
 287 WO's NACHT region reveals homologs throughout arthropods and crustaceans. (b)  
 288 Bayesian phylogenetic trees were constructed based on a 271-aa alignment of all  
 289 homologs with E-value less than  $e^{-15}$  and coverage greater than 70% using the cpREV+G  
 290 model of evolution. To resolve taxa closest to prophage WO, all *Daphnia* sequences were  
 291 removed from the alignment and clusters of highly divergent residues (i.e., 5 or more  
 292 sequential residues with less than 15% pairwise identity) were trimmed. Trees were  
 293 reconstructed based on this 262-aa alignment using the LG+G model of evolution.  
 294 Consensus support values are shown at the nodes. Both trees are unrooted. Chromosomal



295 neighborhood analyses of available animal genome sequences indicate that animal  
296 homologs to the prophage WO protein are on contigs with other animal genes. Scale bar,  
297 1,000 amino acids.

298

## 299 **DISCUSSION**

300 The inaugural metagenomic analysis of the complete genome from phage WO particles  
301 reveals all formerly described phage genetic modules (lysogeny, baseplate, head,  
302 replication, virulence, tail and patatin-like phospholipase<sup>27</sup>) as well as a new group of  
303 genes that we collectively group into a eukaryotic associatoin module (EAM). Some of  
304 these genes (i) encode protein domains and cleavage sites central to eukaryotic functions,  
305 (ii) occur in both phage and metazoan hosts, (iii) comprise the second largest phage gene  
306 to date (14,256 bp) and (iv) are absent from mutualistic, phage-free genomes of  
307 *Wolbachia*. Together, these genes increase the phage WO genome size by roughly 50%  
308 and include ten types of protein domains with four predicted eukaryotic functions: toxins,  
309 host-microbe interactions, host cell suicide, and secretion of proteins through the cell  
310 membrane. Notably, over half of these domain types share greater amino acid homology  
311 to eukaryotic invertebrates than to bacteria in GenBank. Among this subset with  
312 eukaryotic sequence homology, the protein domains are almost exclusively found in the  
313 phage EAM. An EAM has never before been reported in bacteriophage genomes,  
314 possibly because phages of obligate intracellular bacteria occupy a unique eukaryotic-  
315 enclosed niche and are relatively understudied.

316

317 The presence of eukaryotic protein domains in bacteriophage genomes is of special note  
318 as they curiously mirror eukaryotic genes in large eukaryotic viruses that aid in viral  
319 mimicry and manipulation of host processes<sup>47,48</sup>. In phage WO, these animal protein  
320 domains are central to anti-eukaryotic functions including the black widow latrotoxin,  
321 programmed cell death (NACHT), immune evasion (PRANC), and protein-protein  
322 interactions.

323

324 Bacteriophage WO frequently transfer between *Wolbachia* coinfections in the same  
325 animal host<sup>49,50</sup> and to the host genome as part of large transfers of the *Wolbachia*  
326 chromosome<sup>40,41</sup>. We previously reported that phage WO in *Wolbachia* of *Nasonia*  
327 *vitripennis* were also capable of transferring adjacent flanking non-phage genes in the  
328 process of exchange between coinfections<sup>51</sup>. For two of these flanking genes, sequence  
329 evidence indicated that *Wolbachia* genomes may be able to receive eukaryotic  
330 DNA<sup>42,52,53</sup>. However, the nature of these lateral genetic transfers remained to be  
331 elucidated as these regions were not previously known to be part of the packaged phage  
332 genome until now. Here, we demonstrate that genes with eukaryotic homology are  
333 constituents of phage WO and its EAM, and they either retain conservation of eukaryotic  
334 furin cleavage sites and a large eukaryotic-like length (i.e., latrotoxin-CTD), or they  
335 exhibit markedly reduced or no diversity relative to the arthropod homologs as the WO  
336 sequences exist as single or a few representatives (NACHT and TPR-containing  
337 proteins). Moreover, WO protein domains with eukaryotic homology are highly enriched  
338 in the EAM over WO protein domains with bacterial homology. Based on this work, we  
339 suspect that systematic surveys of phage genomes in intimate host-associated bacteria

340 may uncover a broad range of eukaryotic-like protein domains involved in phage  
341 lifecycle adaptations and phage-eukaryote interactions. Of particular note is the reported  
342 association between phage WO genes, specifically ankyrins, transcriptional regulators  
343 and the Ulp1 operon, and *Wolbachia*'s ability to manipulate host reproduction<sup>37,38,54-56</sup>.  
344  
345 The mechanisms by which eukaryotic protein domains are exchanged with phage WO are  
346 unknown and could follow at least three models (Fig. 6). First, animal genetic material  
347 could directly transfer to and from WO genomes during phage particle propagation in the  
348 cytoplasm of animal cells (Fig. 6b) or during packaging inside *Wolbachia* cells that are  
349 lysing and exposed to the eukaryotic cytoplasmic environment. Packaging of eukaryotic  
350 host RNAs, for instance, occur in the virions of herpesvirus<sup>57</sup> and cytomegalovirus<sup>58</sup>.  
351 Second, genes may transfer between animal genomes and the *Wolbachia* chromosome  
352 and then to prophage WO. For this scenario to be plausible, animal genetic material  
353 transferred in random locations in the *Wolbachia* genome would have to be preferentially  
354 lost in non-phage associated locations from the *Wolbachia* chromosome (Fig. 6c) because  
355 domains with eukaryotic homology are highly enriched in the phage/prophage WO EAM  
356 versus the rest of the chromosome (Fig. 2). Third, DNA may transfer first between  
357 animal genomes and intermediary entities, such as eukaryotic viruses or other obligate  
358 intracellular bacteria, and then to phage WO and/or *Wolbachia* (Fig. 6d). In fact, the  
359 PRANC-domain (described in gwv\_1092) was named for its discovery in and association  
360 with eukaryotic Pox viruses. Finally, once DNA is incorporated into a prophage genome,  
361 it is susceptible to recombination with other phage WO haplotypes located in the same  
362 *Wolbachia* chromosome and can transfer from one haplotype to another.

363

364 Alternatively, these protein domains could originate in the phage and be particularly  
365 prone to transfer, maintenance, and spread in their recipient arthropod genomes (Fig. 6b).  
366 For this scenario to be plausible, it would have to imply that phage genetic material  
367 independently and repeatedly transfers to arthropods and spreads through the host  
368 population, which would subsequently be followed by loss of these phage genes or  
369 recombination with other non-transferred phage genetic material so that the eukaryotic  
370 sequence variation clusters separately from the phage WO sequence(s). While each mode  
371 of transfer is possible, the eukaryotic length of these genes, presence of furin protease  
372 domains, and enrichment in the phage WO EAM provides evidence for their eukaryotic  
373 origin.

374

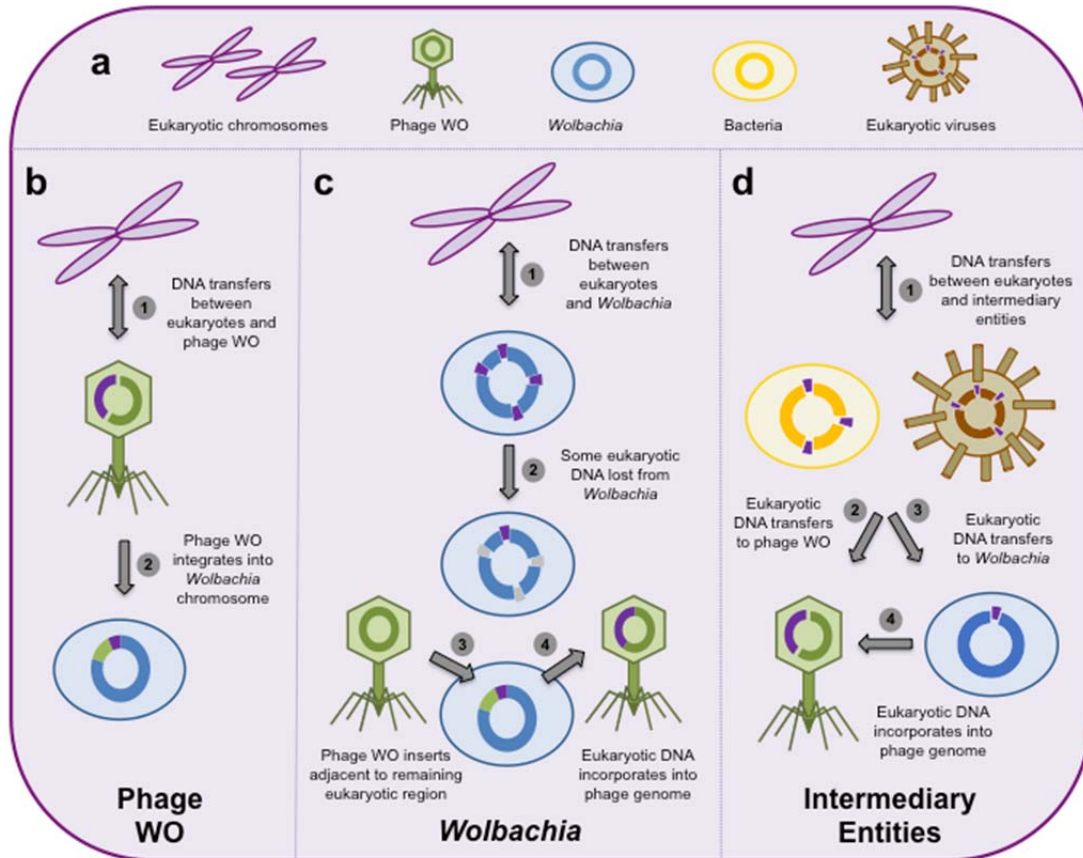

375

376 **Figure 6 | Models of lateral DNA transfer between eukaryotes and bacteriophages.**

377 (a) The eukaryotic cell can harbor multiple microbes capable of horizontal gene transfer.

378 Genetic transfers between eukaryotes and bacteriophages, in particular, can in theory

379 occur (b) directly via incorporation into the phage genome followed by subsequent

380 inclusion in the chromosomal prophage region; (c) indirectly via the transfer of

381 eukaryotic DNA to the *Wolbachia* chromosome or vice versa; and (d) indirectly via the

382 transfer of DNA between eukaryotic chromosomes and intermediary entities, such as

383 eukaryotic viruses and other intracellular bacteria, followed by the transfer to *Wolbachia*

384 and/or phage WO. Since phage EAM genes carrying protein domains central to

385 eukaryotic functions primarily occur in phage/prophage genomes (see Fig. 2), transferred

386 DNA from eukaryotes to non-phage regions in *Wolbachia* is likely eliminated from the

387 bacterial genome under this model (c). Prophage genomes adjacent to these EAM genes  
388 then incorporate the DNA into their packaged genomes and pass it on to new copies of  
389 the phage.  
390  
391 Why are these protein domains present in the EAM of bacteriophage WO? Some phages  
392 of obligate intracellular bacteria may have to overcome two major challenges not  
393 encountered by the well-studied phages of free-living bacteria. First, they are contained  
394 within both bacterial and eukaryotic membranes, posing an enigmatic "two-fold cell  
395 challenge". They may not only have to breach peptidoglycan and permeabilize bacterial  
396 membranes, but they may also have to exit (and enter) across the eukaryotic membrane(s)  
397 that directly encapsulates the bacteria. Second, like their bacterial hosts, they must  
398 survive the internal cellular environment of the animal host, including the innate immune  
399 response and autophagy, while searching for phage-susceptible bacteria. Phage WO can  
400 dwell in the eukaryotic cytoplasm and extracellular matrix that they encounter upon  
401 bacterial lysis<sup>26</sup>, raising the likelihood of direct interaction with host membranes and  
402 intracellular biology. In this context, EAM protein domains are prime candidates to aid in  
403 functions including cell lysis (latrotoxin-CTD), manipulation of programmed cell death  
404 (NACHT and NB-ARC), host ubiquitination (OTU and Ulp1), insecticidal toxicity (ABC  
405 toxin) and interaction with host proteins (ankryin repeats and TPRs). Rather than simply  
406 act as virulence factors to benefit their bacterial host, their massive proportion of genomic  
407 real estate (up to 60% of the prophage genome, Supplementary Fig. 4) implies that they  
408 may be necessary to phage biology and likely have a direct impact on phage propagation.  
409 The concept of phage-mediated ecosystem modification as an alternative to bacterial

410 virulence is not new<sup>59</sup> but, much like the biology of phage WO, is relatively  
411 understudied.  
412  
413 Phage WO is not the only virus described within obligate intracellular bacteria.  
414 *Chlamydiomicroviridae* infect obligate intracellular bacteria, yet still do not directly  
415 contend with the eukaryotic membrane. Rather, they attach to dormant chlamydial cells  
416 (i.e., reticulate bodies) and enter via phagocytosis or endocytosis of the bacteria<sup>60</sup>. The  
417 phages then alter development of their bacterial host, which leads to disintegration of the  
418 chlamydial inclusion and subsequent lysis of the eukaryotic host cell<sup>61,62</sup>. The nature of  
419 phage WO's lifestyle, on the other hand, may require a distinct interaction with multiple  
420 membranes and immune responses because lytic activity of phage WO has been  
421 associated with typical bacterial cell defects including degraded bacterial DNA, a  
422 detached inner membrane, and exit of the phage particles from inside *Wolbachia* and its  
423 host cell into the extracellular matrix of the reproductive tissues<sup>26</sup>. Bacteriophages of  
424 free-living bacteria also regularly colonize eukaryotic environments, particularly those  
425 associated with mucosal surfaces<sup>63</sup>. They, however, do not infect or traverse the  
426 eukaryotic membrane and are still within the genomic boundaries of the bacterial  
427 virosphere.  
428  
429 Temperate dsDNA phages also occur in facultative symbionts of aphids<sup>64</sup> and tsetse  
430 flies<sup>65</sup>. While *Wolbachia* has never successfully been cultured outside of host cells<sup>66</sup>,  
431 these facultative symbionts can replicate both intra- and extracellularly (JW Brandt,  
432 personal communication, July 2015) suggesting that their phages are not constrained by

433 the same two-fold cell challenge. In addition, their phages encode a traditional lytic  
434 cassette (holin and lysozyme) that correlates with the need to deal only with bacterial  
435 membranes. In some cases, the phages harbor bacterial-derived toxins that target  
436 eukaryotic cells<sup>67</sup>, and these function mutualistically in aphids by arresting development  
437 of parasitoid wasp larvae<sup>64</sup>. Furthermore, unlike phage WO that is stably maintained in  
438 the lab, these phages are readily lost in the absence of parasitoids during laboratory  
439 rearing, presumably due to the cost of their toxins<sup>68</sup>.

440

441 In addition to providing new insights into the evolution of bacteriophages and showing  
442 phage WO genomes to be far more complex than previously described, the findings here  
443 reveal evidence for gene sharing between metazoan hosts and phages of obligate  
444 intracellular bacteria. We suggest that the putative acquisition and retooling of intact  
445 eukaryotic domains in phage WO is analogous to the commandeering of host genes by  
446 eukaryotic viruses. Whether lateral genetic transfers between metazoans and  
447 bacteriophages are common in the symbiotic virosphere remains to be determined.

448



449 **METHODS**

450 *Insect and Bacterial Strains*

451 The transfected line of the Mediterranean flour moth *Ephesia kuehniella* harboring  
452 *Wolbachia* strain wCauB was obtained with the help of Takema Fukatsu and Tetsuhiko  
453 Sasaki<sup>22</sup>. Moths were maintained at 24°C and 70% humidity on a diet consisting of wheat  
454 bran, glycerol and dried yeast (20:2:1 w/w). The introgressed line of the parasitoid wasp  
455 *Nasonia giraulti* harboring *Wolbachia* strain wVitA, termed IntG12.1, was previously  
456 derived by repeatedly backcrossing *N. vitripennis* (strain 12.1) females to *N. giraulti*  
457 males for nine generations<sup>69</sup>. The strain was incubated at 25°C using the flesh fly  
458 *Sarcophaga bullata* as host.

459

460 *Phage Particle Purification*

461 Phage particles were isolated according to Fujii et al<sup>22</sup> with modifications. Approximately  
462 4 g of adult insects were homogenized in 29.6 ml cold SM buffer (50mM Tris-HCl, pH  
463 7.5, 0.1 M NaCl, 10mM MgSO<sub>4</sub> · 7H<sub>2</sub>O, and 0.1% (w/v) gelatin). NaCl and RNase A  
464 were added to a final concentration of 1M and 1µg/ml, respectively. The homogenate was  
465 incubated on a shaker at 4°C for 1 h and then centrifuged at 13,000g for 10 min at 4°C.  
466 Polyethylene glycol (PEG) 6000 was added to a final concentration of 10% to precipitate  
467 phage particles, incubated at 4°C for 1 hr with gentle shaking and centrifuged at 13,000g  
468 for 10 min. The pellet was resuspended in 5 ml TM buffer (50 mM Tris-HCl, pH 7.5, 10  
469 mM MgCl<sub>2</sub> · 6H<sub>2</sub>O) and mixed with an equal volume chloroform. The suspension was  
470 centrifuged at 3,000g to remove PEG and the aqueous phase was filtered through a 0.22

471  $\mu\text{m}$  filter to remove bacterial cells. The suspension was centrifuged at 60,000g for 1 h at  
472 4°C to collect phage particles. The pellet was suspended in 10  $\mu\text{l}$  TM buffer.

473

#### 474 *Phage DNA Extraction & Metagenomic Sequencing*

475 The phage suspension was treated with RQ1 RNase-Free DNase (Promega) for 30 min at  
476 37°C, followed by heat inactivation for 10 min at 65°C, to remove host DNA

477 contamination. Phage DNA was extracted from the suspension using the QIAamp

478 MinElute Virus Spin Kit (Qiagen) and amplified using the REPLI-g Mini Kit (Qiagen).

479 Following amplification, paired-end DNA libraries were prepared according to

480 manufacturer's (Illumina) instructions and samples were sequenced with an Illumina

481 HiSeq 2000 (2 $\times$ 100-nt read length).

482

#### 483 *Bioinformatics & Statistics*

484 Metagenomic sequences (reads) were trimmed, paired and assembled into contigs using

485 the CLC Assembler (CLC bio) with bubble size = 50, insertion and deletion cost = 3,

486 mismatch cost = 2, length fraction = 0.6, minimum contig size = 130, similarity = 0.5,

487 minimum distance = 90 and maximum distance = 200. Contigs were compared to the

488 GenBank non-redundant database using NCBI's BLASTN

489 (<http://blast.ncbi.nlm.nih.gov/Blast.cgi>) and those with similarity to phage WO and/or

490 *Wolbachia* (E-value <10<sup>-10</sup>) were manually annotated using Geneious (Biomatters Ltd.).

491 Individual reads were mapped to reference sequences using Geneious. Open reading

492 frame (ORF) homology searches were performed to determine putative function using

493 NCBI's BLASTP (<http://blast.ncbi.nlm.nih.gov/Blast.cgi>) and Wellcome Trust Sanger

494 Institute's pfam database (<http://pfam.sanger.ac.uk>). Coiled coil domains were predicted  
495 with EMBL's Simple Modular Architecture Research Tool (SMART, <http://smart.embl->  
496 [heidelberg.de](http://heidelberg.de)). Furin cleavage sites were identified using PiTou  
497 (<http://www.nuolan.net/reference.html>). The number of genes with and without furin  
498 cleavage sites was analyzed with respect to phage-region using Fisher's Exact Test  
499 (GraphPad Software). Phylogenetic trees were built using the Bayes plugin in Geneious  
500 and model selection for each Bayes analysis was estimated using ProtTest<sup>70</sup>.

501

#### 502 *Confirmation of Phage WO Terminal Genes*

503 Genomic DNA was extracted from *w*VitA-infected *N. vitripennis* (strain 12.1) and  
504 *w*CauB-infected *E. kuehniella* individuals using the Genra Puregene Tissue Kit (Qiagen).  
505 Primers were designed for both WOVitA1 and WOCauB3 *attP* sites, respectively:  
506 VitA1\_attF (5'- CGA AGA ACC AGC ACA GGG TGG-3'), VitA1\_attR (5'- GCT GGA  
507 AGA GGG CAT CTG CAT C-3'), CauB3\_attF (5'- TCG TGA CTG CCC TAT TGC  
508 TGC T – 3') and CauB3\_attR (5'- ATG CGG CCA AAG CTG GGT GT – 3').

509 Amplification was performed in a Veriti thermal cycler (Applied Biosystems) using  
510 GoTaq green master mix (Promega) under the following conditions: 94°C for 2 min; 35  
511 cycles of 94°C for 30 s, 53°C for 30 s, 72°C for 1 min; and a final elongation cycle of  
512 72°C for 10 min. PCR products were sequenced via Sanger sequencing (Genewiz, Inc).

513

514 **REFERENCES**

- 515 1. Edwards, R.A. & Rohwer, F. Viral metagenomics. *Nat Rev Microbiol* **3**, 504-10  
516 (2005).
- 517 2. Hendrix, R.W., Smith, M.C., Burns, R.N., Ford, M.E. & Hatfull, G.F.  
518 Evolutionary relationships among diverse bacteriophages and prophages: all the  
519 world's a phage. *Proc Natl Acad Sci U S A* **96**, 2192-7 (1999).
- 520 3. Brussow, H. The not so universal tree of life or the place of viruses in the living  
521 world. *Philos Trans R Soc Lond B Biol Sci* **364**, 2263-74 (2009).
- 522 4. King, A.M.Q., Adams, M.J., Lefkowitz, E.J. & Carstens, E.B. *Virus taxonomy:  
523 classification and nomenclature of viruses: Ninth Report of the International  
524 Committee on Taxonomy of Viruses.*, 1327 (Elsevier, San Diego, 2012).
- 525 5. Nasir, A., Forterre, P., Kim, K.M. & Caetano-Anolles, G. The distribution and  
526 impact of viral lineages in domains of life. *Front Microbiol* **5**, 194 (2014).
- 527 6. Prangishvili, D., Forterre, P. & Garrett, R.A. Viruses of the Archaea: a unifying  
528 view. *Nat Rev Microbiol* **4**, 837-48 (2006).
- 529 7. Forterre, P. Giant viruses: conflicts in revisiting the virus concept. *Intervirology*  
530 **53**, 362-78 (2010).
- 531 8. Raoult, D. TRUC or the need for a new microbial classification. *Intervirology* **56**,  
532 349-53 (2013).
- 533 9. Elde, N.C. & Malik, H.S. The evolutionary conundrum of pathogen mimicry. *Nat*  
534 *Rev Microbiol* **7**, 787-97 (2009).
- 535 10. Rappoport, N. & Linial, M. Viral proteins acquired from a host converge to  
536 simplified domain architectures. *PLoS Comput Biol* **8**, e1002364 (2012).
- 537 11. Colson, P. & Raoult, D. Gene repertoire of amoeba-associated giant viruses.  
538 *Intervirology* **53**, 330-43 (2010).
- 539 12. Canchaya, C., Fournous, G. & Brussow, H. The impact of prophages on bacterial  
540 chromosomes. *Mol Microbiol* **53**, 9-18 (2004).
- 541 13. Lindell, D. *et al.* Transfer of photosynthesis genes to and from Prochlorococcus  
542 viruses. *Proc Natl Acad Sci U S A* **101**, 11013-8 (2004).
- 543 14. Dammeyer, T., Bagby, S.C., Sullivan, M.B., Chisholm, S.W. & Frankenberg-  
544 Dinkel, N. Efficient phage-mediated pigment biosynthesis in oceanic  
545 cyanobacteria. *Curr Biol* **18**, 442-8 (2008).
- 546 15. Werren, J.H., Baldo, L. & Clark, M.E. Wolbachia: master manipulators of  
547 invertebrate biology. *Nat Rev Microbiol* **6**, 741-51 (2008).
- 548 16. Zug, R. & Hammerstein, P. Still a host of hosts for Wolbachia: analysis of recent  
549 data suggests that 40% of terrestrial arthropod species are infected. *PLoS One* **7**,  
550 e38544 (2012).
- 551 17. Cho, K.O., Kim, G.W. & Lee, O.K. Wolbachia bacteria reside in host Golgi-  
552 related vesicles whose position is regulated by polarity proteins. *PLoS One* **6**,  
553 e22703 (2011).
- 554 18. Louis, C. & Nigro, L. Ultrastructural evidence of Wolbachia Rickettsiales in  
555 *Drosophila simulans* and their relationships with unidirectional cross-  
556 incompatibility. *Journal of Invertebrate Pathology* **54**, 39-44 (1989).
- 557 19. Gavotte, L. *et al.* A Survey of the bacteriophage WO in the endosymbiotic  
558 bacteria Wolbachia. *Mol Biol Evol* **24**, 427-35 (2007).

- 559 20. Kent, B.N. & Bordenstein, S.R. Phage WO of Wolbachia: lambda of the  
560 endosymbiont world. *Trends Microbiol* **18**, 173-81 (2010).
- 561 21. Metcalf, J.A. & Bordenstein, S.R. The complexity of virus systems: the case of  
562 endosymbionts. *Curr Opin Microbiol* **15**, 546-52 (2012).
- 563 22. Fujii, Y., Kubo, T., Ishikawa, H. & Sasaki, T. Isolation and characterization of the  
564 bacteriophage WO from Wolbachia, an arthropod endosymbiont. *Biochem*  
565 *Biophys Res Commun* **317**, 1183-8 (2004).
- 566 23. Masui, S. *et al.* Bacteriophage WO and virus-like particles in Wolbachia, an  
567 endosymbiont of arthropods. *Biochem Biophys Res Commun* **283**, 1099-104  
568 (2001).
- 569 24. Sanogo, Y.O. & Dobson, S.L. WO bacteriophage transcription in Wolbachia-  
570 infected *Culex pipiens*. *Insect Biochem Mol Biol* **36**, 80-5 (2006).
- 571 25. Tanaka, K., Furukawa, S., Nikoh, N., Sasaki, T. & Fukatsu, T. Complete WO  
572 phage sequences reveal their dynamic evolutionary trajectories and putative  
573 functional elements required for integration into the Wolbachia genome. *Appl*  
574 *Environ Microbiol* **75**, 5676-86 (2009).
- 575 26. Bordenstein, S.R., Marshall, M.L., Fry, A.J., Kim, U. & Wernegreen, J.J. The  
576 tripartite associations between bacteriophage, Wolbachia, and arthropods. *PLoS*  
577 *Pathog* **2**, e43 (2006).
- 578 27. Kent, B.N., Funkhouser, L.J., Setia, S. & Bordenstein, S.R. Evolutionary  
579 genomics of a temperate bacteriophage in an obligate intracellular bacteria  
580 (Wolbachia). *PLoS One* **6**, e24984 (2011).
- 581 28. Zhang, D., de Souza, R.F., Anantharaman, V., Iyer, L.M. & Aravind, L.  
582 Polymorphic toxin systems: Comprehensive characterization of trafficking modes,  
583 processing, mechanisms of action, immunity and ecology using comparative  
584 genomics. *Biol Direct* **7**, 18 (2012).
- 585 29. Ioannidis, P. *et al.* Rapid transcriptome sequencing of an invasive pest, the brown  
586 marmorated stink bug *Halyomorpha halys*. *BMC Genomics* **15**, 738 (2014).
- 587 30. Goodacre, S.L., Martin, O.Y., Thomas, C.F. & Hewitt, G.M. Wolbachia and other  
588 endosymbiont infections in spiders. *Mol Ecol* **15**, 517-27 (2006).
- 589 31. Garb, J.E. & Hayashi, C.Y. Molecular evolution of alpha-latrotoxin, the  
590 exceptionally potent vertebrate neurotoxin in black widow spider venom. *Mol*  
591 *Biol Evol* **30**, 999-1014 (2013).
- 592 32. Bhere, K.V., Haney, R.A., Ayoub, N.A. & Garb, J.E. Gene structure, regulatory  
593 control, and evolution of black widow venom latrotoxins. *FEBS Lett* **588**, 3891-7  
594 (2014).
- 595 33. Werren, J.H. *et al.* Functional and evolutionary insights from the genomes of  
596 three parasitoid *Nasonia* species. *Science* **327**, 343-8 (2010).
- 597 34. Chang, S.J. *et al.* Poxvirus host range protein CP77 contains an F-box-like  
598 domain that is necessary to suppress NF-kappaB activation by tumor necrosis  
599 factor alpha but is independent of its host range function. *J Virol* **83**, 4140-52  
600 (2009).
- 601 35. Cerveny, L. *et al.* Tetratricopeptide repeat motifs in the world of bacterial  
602 pathogens: role in virulence mechanisms. *Infect Immun* **81**, 629-35 (2013).

- 603 36. Pan, X., Luhrmann, A., Satoh, A., Laskowski-Arce, M.A. & Roy, C.R. Ankyrin  
604 repeat proteins comprise a diverse family of bacterial type IV effectors. *Science*  
605 **320**, 1651-4 (2008).
- 606 37. Pichon, S. *et al.* The expression of one ankyrin pk2 allele of the WO prophage is  
607 correlated with the Wolbachia feminizing effect in isopods. *BMC Microbiol* **12**,  
608 55 (2012).
- 609 38. Walker, T. *et al.* Ankyrin repeat domain-encoding genes in the wPip strain of  
610 Wolbachia from the *Culex pipiens* group. *BMC Biol* **5**, 39 (2007).
- 611 39. Shoemaker, D.D., Ross, K.G., Keller, L., Vargo, E.L. & Werren, J.H. Wolbachia  
612 infections in native and introduced populations of fire ants (*Solenopsis* spp.).  
613 *Insect Mol Biol* **9**, 661-73 (2000).
- 614 40. Dunning Hotopp, J.C. *et al.* Widespread lateral gene transfer from intracellular  
615 bacteria to multicellular eukaryotes. *Science* **317**, 1753-6 (2007).
- 616 41. Funkhouser-Jones, L.J. *et al.* Wolbachia co-infection in a hybrid zone: discovery  
617 of horizontal gene transfers from two Wolbachia supergroups into an animal  
618 genome. *PeerJ* **3**, e1479 (2015).
- 619 42. Klasson, L., Kambris, Z., Cook, P.E., Walker, T. & Sinkins, S.P. Horizontal gene  
620 transfer between Wolbachia and the mosquito *Aedes aegypti*. *BMC Genomics* **10**,  
621 33 (2009).
- 622 43. Koonin, E.V. & Aravind, L. Origin and evolution of eukaryotic apoptosis: the  
623 bacterial connection. *Cell Death Differ* **9**, 394-404 (2002).
- 624 44. Koonin, E.V. & Aravind, L. The NACHT family - a new group of predicted  
625 NTPases implicated in apoptosis and MHC transcription activation. *Trends*  
626 *Biochem Sci* **25**, 223-4 (2000).
- 627 45. Leipe, D.D., Koonin, E.V. & Aravind, L. STAND, a class of P-loop NTPases  
628 including animal and plant regulators of programmed cell death: multiple,  
629 complex domain architectures, unusual phyletic patterns, and evolution by  
630 horizontal gene transfer. *J Mol Biol* **343**, 1-28 (2004).
- 631 46. Hargreaves, K.R., Kropinski, A.M. & Clokie, M.R. What does the talking?:  
632 quorum sensing signalling genes discovered in a bacteriophage genome. *PLoS*  
633 *One* **9**, e85131 (2014).
- 634 47. Alcami, A. & Koszinowski, U.H. Viral mechanisms of immune evasion. *Immunol*  
635 *Today* **21**, 447-55 (2000).
- 636 48. Seet, B.T. *et al.* Poxviruses and immune evasion. *Annu Rev Immunol* **21**, 377-423  
637 (2003).
- 638 49. Bordenstein, S.R. & Wernegreen, J.J. Bacteriophage flux in endosymbionts  
639 (*Wolbachia*): infection frequency, lateral transfer, and recombination rates. *Mol*  
640 *Biol Evol* **21**, 1981-91 (2004).
- 641 50. Masui, S., Kamoda, S., Sasaki, T. & Ishikawa, H. Distribution and evolution of  
642 bacteriophage WO in *Wolbachia*, the endosymbiont causing sexual alterations in  
643 arthropods. *J Mol Evol* **51**, 491-7 (2000).
- 644 51. Kent, B.N. *et al.* Complete bacteriophage transfer in a bacterial endosymbiont  
645 (*Wolbachia*) determined by targeted genome capture. *Genome Biol Evol* **3**, 209-18  
646 (2011).



- 647 52. Duploux, A. *et al.* Draft genome sequence of the male-killing Wolbachia strain  
648 wBoll reveals recent horizontal gene transfers from diverse sources. *BMC*  
649 *Genomics* **14**, 20 (2013).
- 650 53. Woolfit, M., Iturbe-Ormaetxe, I., McGraw, E.A. & O'Neill, S.L. An ancient  
651 horizontal gene transfer between mosquito and the endosymbiotic bacterium  
652 Wolbachia pipientis. *Mol Biol Evol* **26**, 367-74 (2009).
- 653 54. Beckmann, J.F. & Fallon, A.M. Detection of the Wolbachia protein WPIP0282 in  
654 mosquito spermathecae: implications for cytoplasmic incompatibility. *Insect*  
655 *Biochem Mol Biol* **43**, 867-78 (2013).
- 656 55. Pinto, S.B. *et al.* Transcriptional regulation of *Culex pipiens* mosquitoes by  
657 Wolbachia influences cytoplasmic incompatibility. *PLoS Pathog* **9**, e1003647  
658 (2013).
- 659 56. Sutton, E.R., Harris, S.R., Parkhill, J. & Sinkins, S.P. Comparative genome  
660 analysis of Wolbachia strain wAu. *BMC Genomics* **15**, 928 (2014).
- 661 57. Amen, M.A. & Griffiths, A. Packaging of Non-Coding RNAs into Herpesvirus  
662 Virions: Comparisons to Coding RNAs. *Front Genet* **2**, 81 (2011).
- 663 58. Terhune, S.S., Schroer, J. & Shenk, T. RNAs are packaged into human  
664 cytomegalovirus virions in proportion to their intracellular concentration. *J Virol*  
665 **78**, 10390-8 (2004).
- 666 59. Abedon, S.T. & Lejeune, J.T. Why bacteriophage encode exotoxins and other  
667 virulence factors. *Evol Bioinform Online* **1**, 97-110 (2005).
- 668 60. Sliwa-Dominiak, J., Suszynska, E., Pawlikowska, M. & Deptula, W. Chlamydia  
669 bacteriophages. *Arch Microbiol* **195**, 765-71 (2013).
- 670 61. Hsia, R., Ohayon, H., Gounon, P., Dautry-Varsat, A. & Bavoil, P.M. Phage  
671 infection of the obligate intracellular bacterium, *Chlamydia psittaci* strain guinea  
672 pig inclusion conjunctivitis. *Microbes Infect* **2**, 761-72 (2000).
- 673 62. Salim, O., Skilton, R.J., Lambden, P.R., Fane, B.A. & Clarke, I.N. Behind the  
674 chlamydial cloak: the replication cycle of chlamydiophage Chp2, revealed.  
675 *Virology* **377**, 440-5 (2008).
- 676 63. Barr, J.J. *et al.* Bacteriophage adhering to mucus provide a non-host-derived  
677 immunity. *Proc Natl Acad Sci U S A* **110**, 10771-6 (2013).
- 678 64. Moran, N.A., Degnan, P.H., Santos, S.R., Dunbar, H.E. & Ochman, H. The  
679 players in a mutualistic symbiosis: insects, bacteria, viruses, and virulence genes.  
680 *Proc Natl Acad Sci U S A* **102**, 16919-26 (2005).
- 681 65. Belda, E., Moya, A., Bentley, S. & Silva, F.J. Mobile genetic element  
682 proliferation and gene inactivation impact over the genome structure and  
683 metabolic capabilities of *Sodalis glossinidius*, the secondary endosymbiont of  
684 tsetse flies. *BMC Genomics* **11**, 449 (2010).
- 685 66. Rasgon, J.L., Gamston, C.E. & Ren, X. Survival of Wolbachia pipientis in cell-  
686 free medium. *Appl Environ Microbiol* **72**, 6934-7 (2006).
- 687 67. Degnan, P.H. & Moran, N.A. Diverse phage-encoded toxins in a protective insect  
688 endosymbiont. *Appl Environ Microbiol* **74**, 6782-91 (2008).
- 689 68. Oliver, K.M., Degnan, P.H., Hunter, M.S. & Moran, N.A. Bacteriophages encode  
690 factors required for protection in a symbiotic mutualism. *Science* **325**, 992-4  
691 (2009).

- 692 69. Chafee, M.E. *et al.* Decoupling of host-symbiont-phage coadaptations following  
693 transfer between insect species. *Genetics* **187**, 203-15 (2011).  
694 70. Abascal, F., Zardoya, R. & Posada, D. ProtTest: selection of best-fit models of  
695 protein evolution. *Bioinformatics* **21**, 2104-5 (2005).  
696

697



698 **SUPPLEMENTARY INFORMATION**

699

700 **Supplementary Figure 1** | Sequencing reveals the phage, prophage and bacterial *att* sites

701 for WOVitA1.

702 **Supplementary Figure 2** | Ankyrin repeat domain.

703 **Supplementary Figure 3** | TPR domain.

704 **Supplementary Figure 4** | Prophage WO dedicates nearly half of its genome to

705 eukaryotic host association.

706 **Supplementary Table 1** | *Wolbachia* and phage WO nomenclature.

707 **Supplementary Table 2** | Comparative genomics of prophage WO.

708 **Supplementary Table 3** | Phage WO EAM furin cleavage sites.

709 **Supplementary Table 4** | The phage WO PRANC domain shares amino acid homology

710 with multiple eukaryotic host peptides.

711

712 **DATA AVAILABILITY**

713 The phage WOVitA1 genome assembly reported in this paper has been deposited in

714 NCBI under accession number KX522565.

715

716 The *N. vitripennis* viral metagenome sequences have been deposited in the SRA under

717 accession number SRR3560636 and BioProject PRJNA321548. The *w*CauB-infected *E.*

718 *kuehniella* viral metagenome sequences have been deposited in the SRA under accession

719 number SRR3536639 and BioProject PRJNA321549.

720

721 **ACKNOWLEDGEMENTS**

722 We thank Tetsuhiko Sasaki and Takema Fukatsu for assistance with providing the  
723 wCauB-infected moths; Rini Pauly for computational assistance; Merri Lynn Casem for  
724 providing widow spiders; Kerry Oliver for information on *Hamiltonella*; Yannick Wurm  
725 for information on *Solenopsis*; and Michael Gerth, Julie Dunning Hotopp, Kevin Kohl,  
726 Jason Metcalf for feedback on the manuscript. We apologize to our colleagues for not  
727 being able to include all possible references due to citation restrictions. This research was  
728 funded by NIH Awards R01 GM085163 and R21 HD086833 and NSF Awards DEB  
729 1046149 and IOS 1456778 to SRB. The funders had no role in study design, data  
730 collection and interpretation or the decision to submit the work for publication.

731

### 732 **AUTHOR CONTRIBUTION**

733 Sarah Bordenstein designed and performed the experiments, analyzed the data, prepared  
734 figures and tables, wrote and reviewed drafts of the paper.

735

736 Seth Bordenstein conceived and helped design the experiments, analyzed the data, wrote  
737 and reviewed drafts of the paper.

738

### 739 **COMPETING FINANCIAL INTERESTS**

740 The authors declare no competing financial interests.

741

### 742 **AUTHOR INFORMATION**

743 Correspondence and requests for materials should be addressed to

744 s.bordenstein@vanderbilt.edu or sarah.bordenstein@vanderbilt.edu.

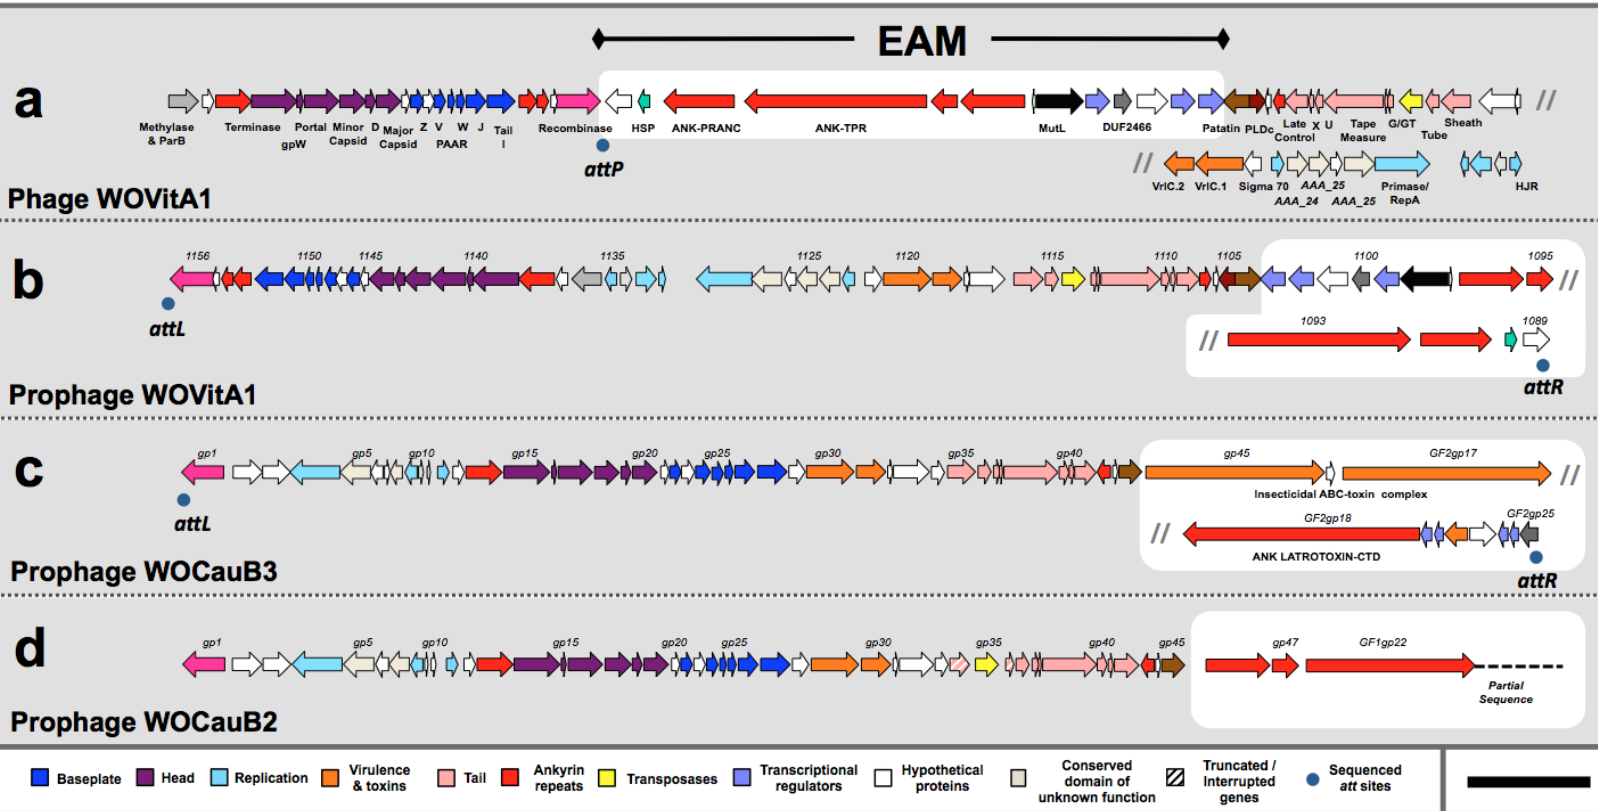

## a Eukaryotic homology

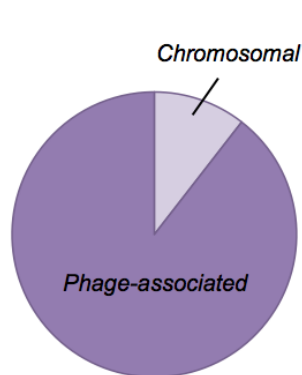

Latrotoxin-CTD

PRANC

NACHT

gww\_1093

SecA1<sup>+</sup>

SecA2<sup>+</sup>

Octomom-NTD

*Phage-associated* | *Chromosomal*

8 | 2 \*

2

1

2

1

1

2

## b Bacterial homology

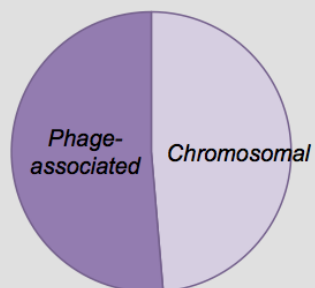

ABC toxin

Ulp1

OTU

NB-ARC

*Phage-associated* | *Chromosomal*

1

8 | 5

7 | 9

3 | 4

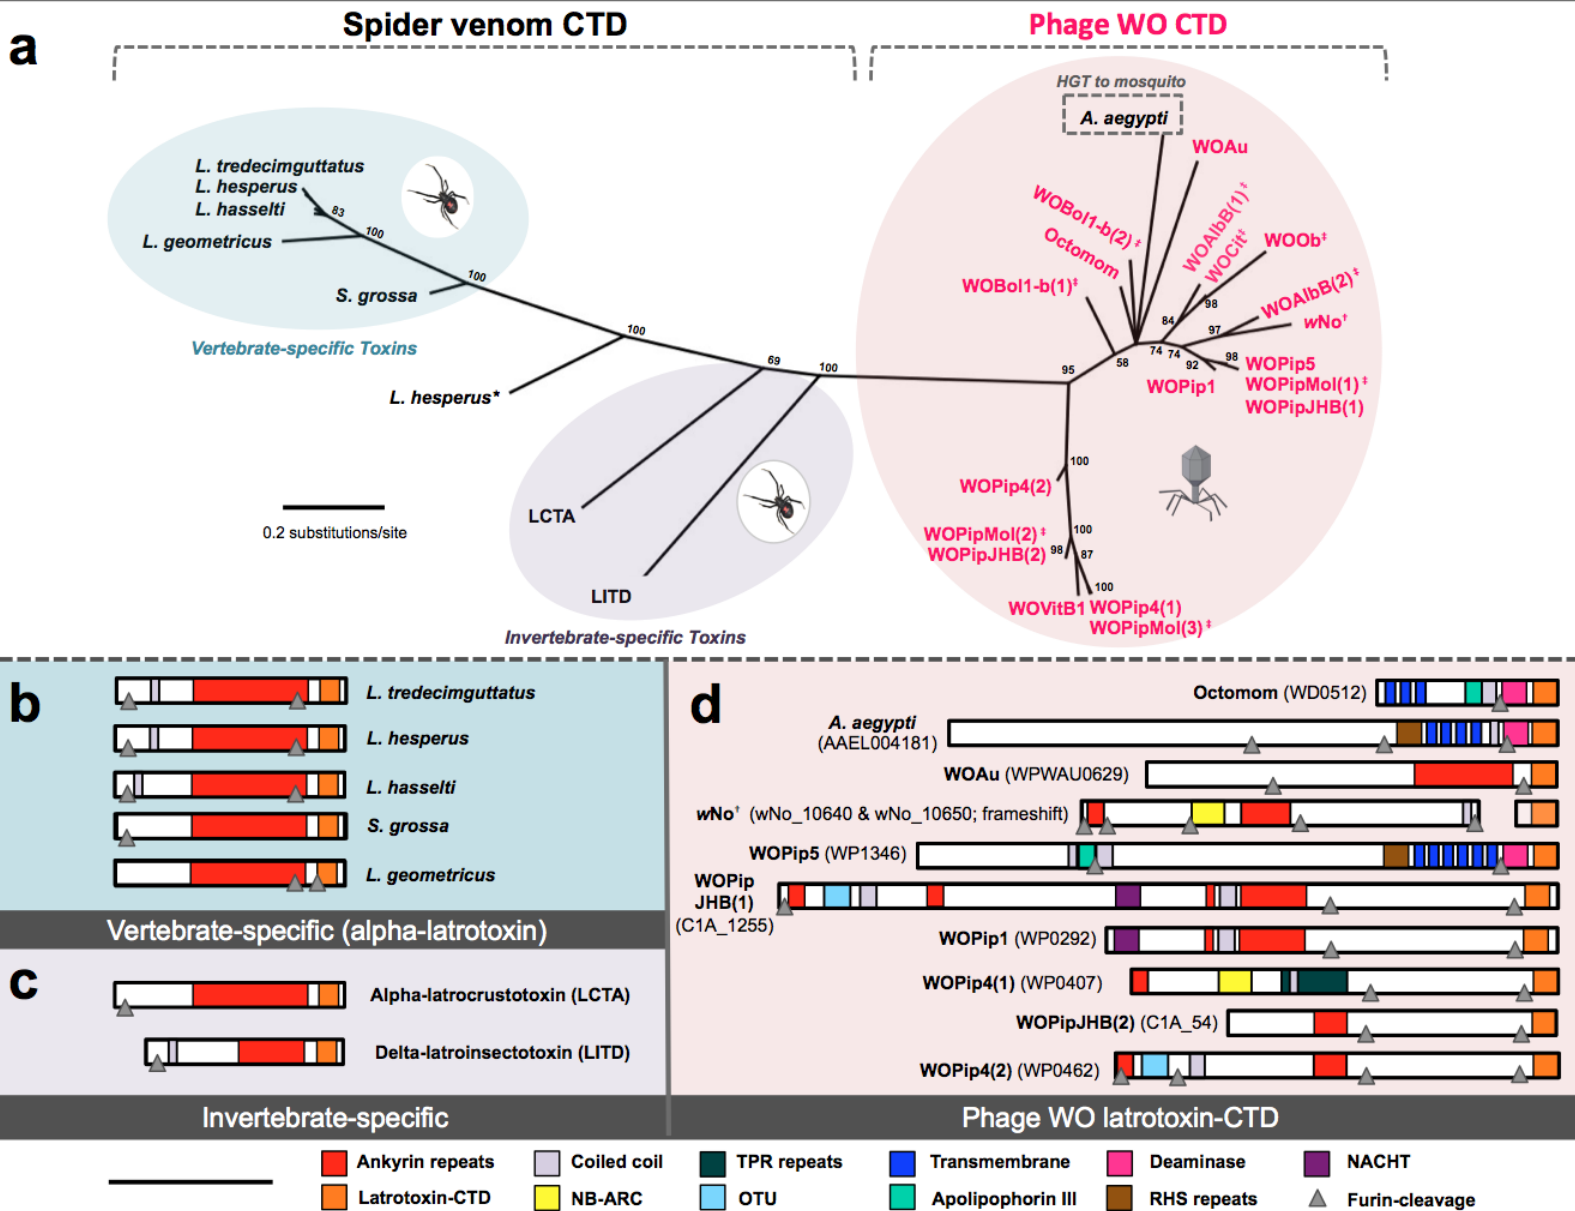

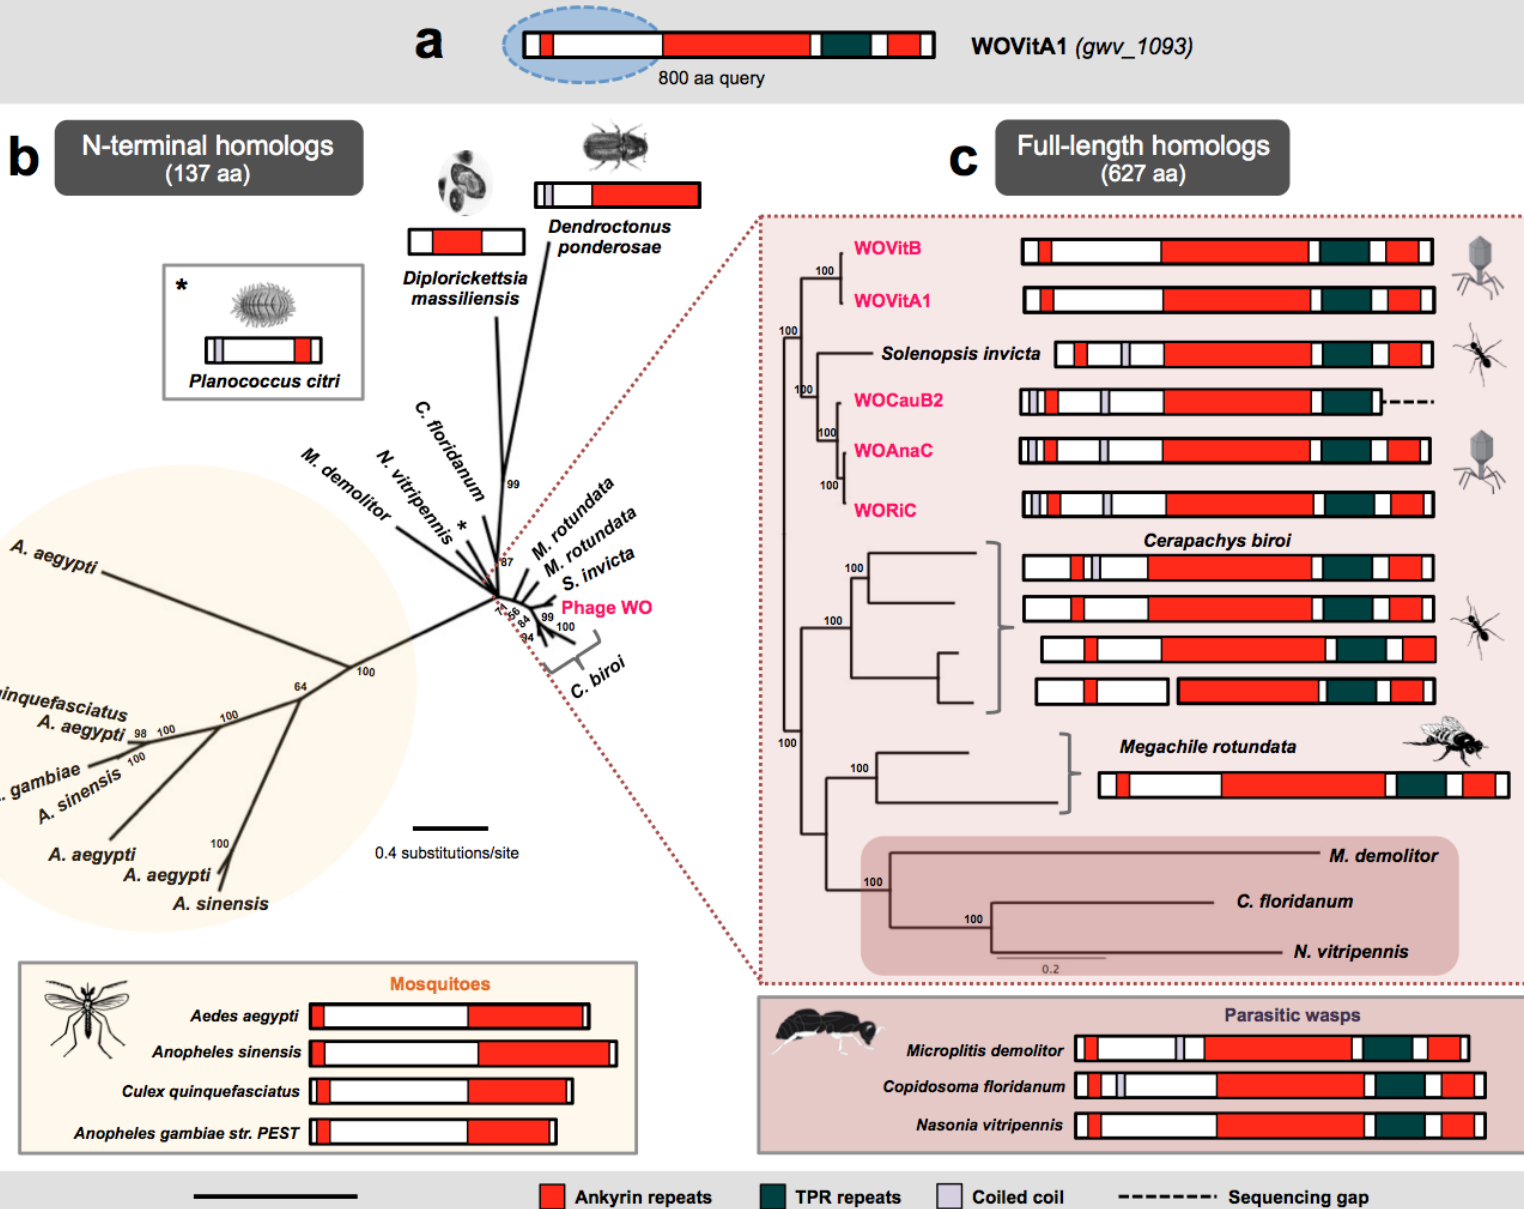

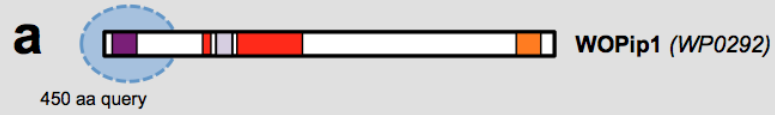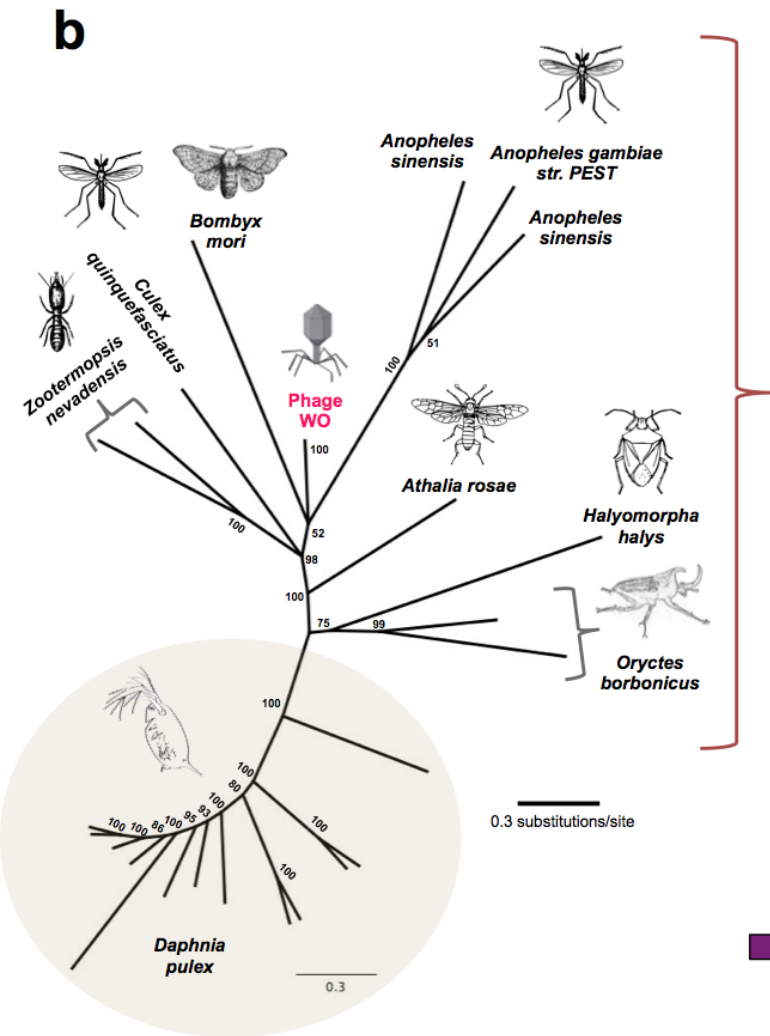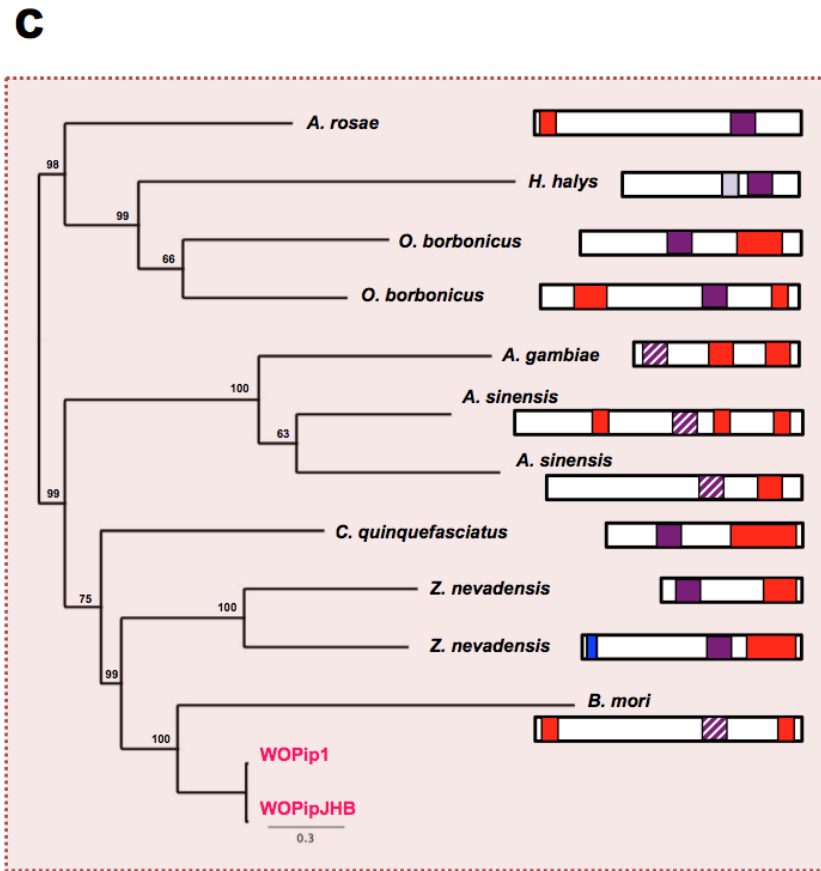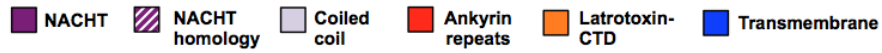



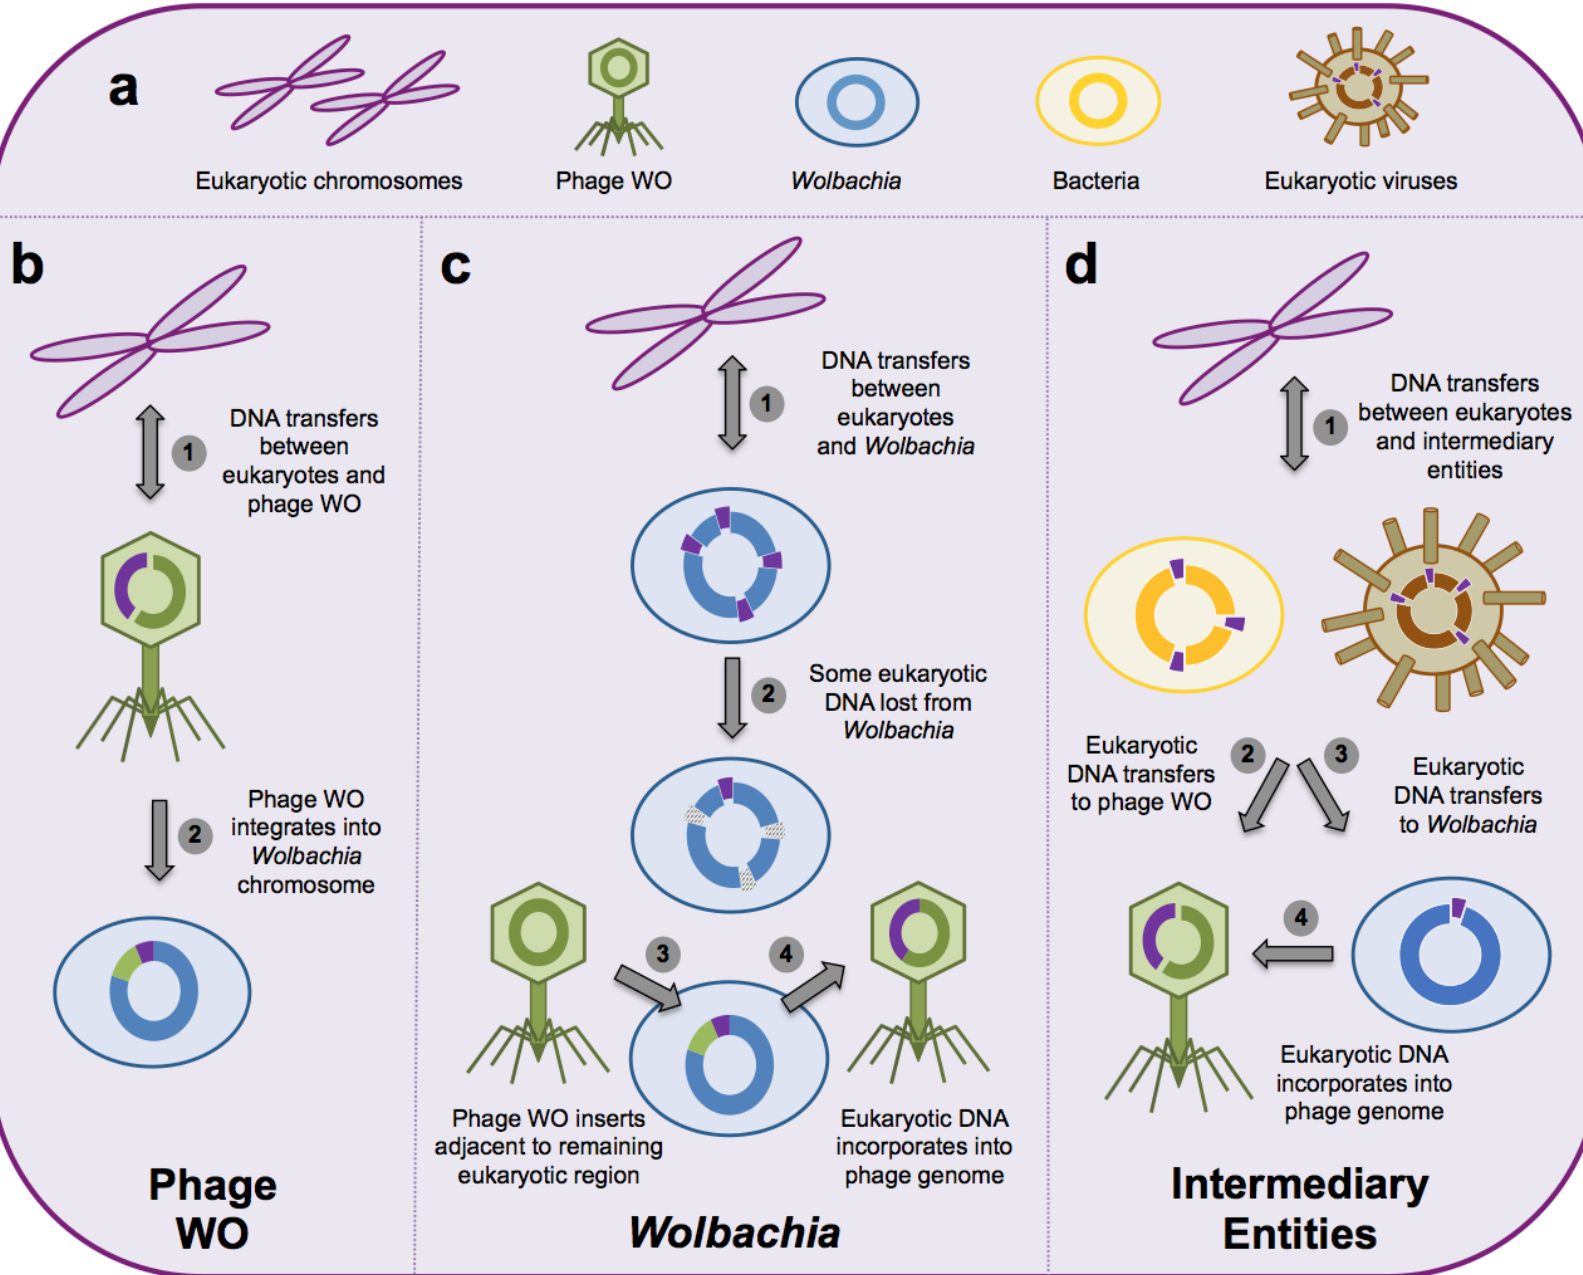

Source: http://biorxiv.org/content/10.1101/049049v2.full.pdf
